# Supplementary material
Source: PubMed Central journal article supplement (PMC8413254)
Supplement: mmc1.pdf [file mmc1.pdf]

Supplementary Table 1. Sample Cohort demographics.

| Age            | Total   | Vaccination Status |          |                  |           |         |
|----------------|---------|--------------------|----------|------------------|-----------|---------|
|                |         | Unvaccinated       | One Dose | One or Two Doses | Two Doses | Unknown |
| <b>All</b>     | 203,065 | 106,501            | 15,451   | 1,050            | 5,844     | 74,255  |
| <b>&lt;35</b>  | 72,148  | 54,960             | 3,485    | 274              | 1,870     | 11,559  |
| <b>35-50</b>   | 38,967  | 28,160             | 4,133    | 242              | 1,215     | 5,217   |
| <b>50-65</b>   | 27,532  | 16,769             | 5,517    | 355              | 1,527     | 3,364   |
| <b>65+</b>     | 9,718   | 5,307              | 2,058    | 170              | 1,147     | 1,036   |
| <b>Unknown</b> | 54,700  | 1,305              | 222      | 9                | 85        | 53,079  |

Supplementary Table 2. Quality Control Metrics for SARS-CoV-2 Sequencing Runs

| Quality Metric               | Criteria           |
|------------------------------|--------------------|
| Chip Loading                 | > 60%              |
| Total Reads                  | > 45 million       |
| Enrichment                   | >95%               |
| Polyclonal Ratio             | < 55% <sup>a</sup> |
| Low Quality                  | < 26%              |
| Usable Reads                 | > 30%              |
| Aligned Bases                | > 80% <sup>b</sup> |
| Mean Raw Accuracy            | ~100%              |
| Chip Test Fragment Alignment | > 80%              |

<sup>a</sup>Slightly higher polyclonals acceptable if low quality < 10%

<sup>b</sup>Can be less if base coverage and % reads on target is high

*Supplementary Table 3. Quality Control Metrics for SARS-CoV-2 Sequencing Samples*

| <b>Quality Metric</b>         | <b>Criteria</b> |
|-------------------------------|-----------------|
| Number of Mapped Reads        | > 500,000       |
| Percent Reads on Target       | >90%            |
| Average Base Coverage Depth   | > 1,200         |
| Uniformity of Base Coverage   | > 85%           |
| Assigned Amplicon Reads       | > 90%           |
| Amplicons with No Strand Bias | > 90%           |
| Amplicons Reading End to End  | > 80%           |
| Bases in Target Regions       | 30,253          |
| Base Reads on Target          | > 85%           |
| Target Base Coverage (100x)   | > 90%           |

**A**Tree scale:  
0.001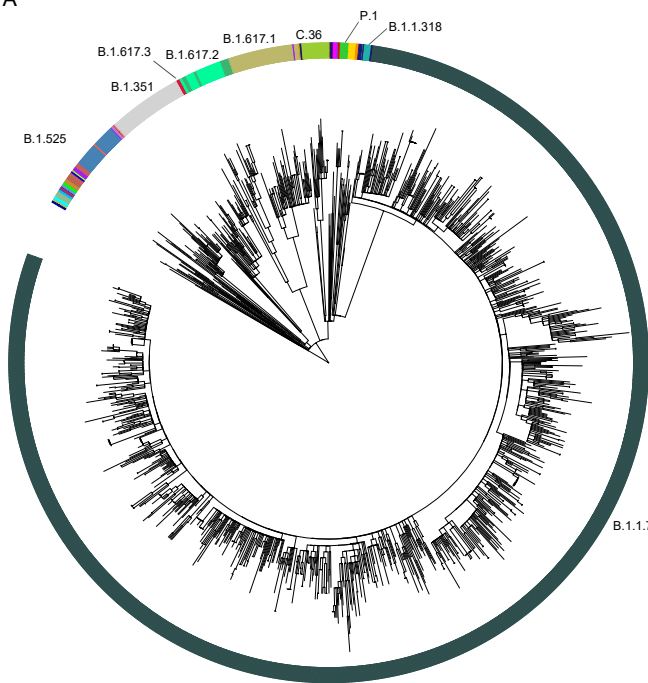**B**

Tree scale: 0.001

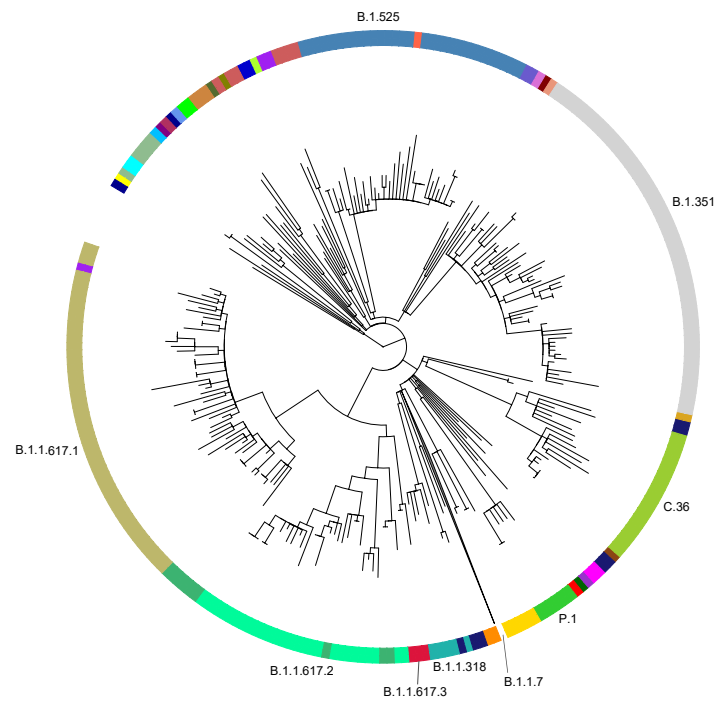

**Supplementary Figure 1: A)** Phylogenetic analysis of 1,361 SARS-CoV-2 sequences using IQ-TREE2 and visualised in iTOL. **B)** Phylogenetic tree excluding B.1.1.7.
